# Supplementary material for: CTLA-4 Protects against Angiotensin II-Induced Abdominal Aortic Aneurysm Formation in Mice
Source: PubMed Central journal article supplement (PMC6542846; doi:10.1038/s41598-019-44523-6), 2019-05-30
Supplement: 41598_2019_44523_MOESM1_ESM.pdf [file 41598_2019_44523_MOESM1_ESM.pdf]

## Supplemental Material

### **CTLA-4 Protects against Angiotensin II-Induced Abdominal Aortic Aneurysm Formation in Mice**

Hilman Zulkifli Amin<sup>1,2,3</sup>, Naoto Sasaki<sup>1,2</sup>, Tomoya Yamashita<sup>1</sup>, Taiji Mizoguchi<sup>1,2</sup>, Tomohiro Hayashi<sup>1</sup>, Takuo Emoto<sup>1</sup>, Takuya Matsumoto<sup>1</sup>, Naofumi Yoshida<sup>1</sup>, Tokiko Tabata<sup>1</sup>, Sayo Horibe<sup>2</sup>, Shoji Kawauchi<sup>4</sup>, Yoshiyuki Rikitake<sup>2</sup>, Ken-ichi Hirata<sup>1</sup>

<sup>1</sup>Division of Cardiovascular Medicine, Department of Internal Medicine, Kobe University Graduate School of Medicine, Kobe, Japan

<sup>2</sup>Laboratory of Medical Pharmaceutics, Kobe Pharmaceutical University, Kobe, Japan

<sup>3</sup>Faculty of Medicine, Universitas Indonesia, Jakarta, Indonesia

<sup>4</sup>Education and Research Center for Clinical Pharmacy, Kobe Pharmaceutical University, Kobe, Japan

#### **Address correspondence to:**

Naoto Sasaki, MD, PhD. E-mail: n-sasaki@kobepharm-u.ac.jp  
Laboratory of Medical Pharmaceutics, Kobe Pharmaceutical University,  
4-19-1, Motoyamakita-machi, Higashinada-ku, Kobe, 658-8558, Japan  
Telephone number; +81-78-441-7579, FAX number; +81-78-441-7579

## Supplemental Table 1

| Parameters               | Control              | CTLA-4-Tg            |
|--------------------------|----------------------|----------------------|
| Body weight, g           | 27.9 ± 1.6 (n=15)    | 28.7 ± 1.5 (n=15)    |
| SBP (before), mmHg       | 103.5 ± 6.6 (n=15)   | 105.4 ± 4.7 (n=15)   |
| SBP (after), mmHg        | 134.0 ± 14.1* (n=15) | 128.7 ± 25.3* (n=15) |
| Total-cholesterol, mg/dl | 826.3 ± 284.3 (n=19) | 815.4 ± 163.9 (n=20) |
| Triglycerides, mg/dl     | 45.0 ± 23.6 (n=19)   | 50.2 ± 26.2 (n=20)   |

Body weight, SBP, and plasma lipid profile, in 16-week-old control apolipoprotein E-deficient (*ApoE*<sup>-/-</sup>) and cytotoxic T lymphocyte-associated antigen-4 (CTLA-4)-Tg/*ApoE*<sup>-/-</sup> mice. Data are expressed as mean ± SD. SBP indicates systolic blood pressure; SBP (before), SBP before angiotensin II infusion; SBP (after), SBP after angiotensin II infusion for 4 weeks. \**P*<0.05 vs SBP (before) in the same group; paired *t*-test. There are no statistically significant differences in all parameters between angiotensin II-infused *ApoE*<sup>-/-</sup> and CTLA-4-Tg/*ApoE*<sup>-/-</sup> mice.

## Supplemental Table 2

| Genes        | Forward primers          | Reverse primers            |
|--------------|--------------------------|----------------------------|
| <i>Ifng</i>  | CGGCACAGTCATTGAAAGCCTA   | GTTGCTGATGGCCTGATTGCT      |
| <i>Ccl2</i>  | GCATCCACGTGTTGGCTCA      | CTCCAGCCTACTCATTGGGATCA    |
| <i>Il1b</i>  | TCCAGGATGAGGACATGAGCAC   | GAACGTACACACCAGCAGGTTA     |
| <i>Il6</i>   | CCACTTCACAAGTCGGAGGCTTTA | GCAAGTGCATCATCGTTGTTTCATAC |
| <i>Icam1</i> | CAATTCACACTGAATGCCAGCTC  | CAAGCAAGTCCGTCTCGTCCA      |
| <i>Vcam1</i> | TGCCGGCATATACGAGTGTGA    | CCCGATGGCAGGTATTACCAAG     |
| <i>Mmp2</i>  | GATAACCTGGATGCCGTCGTG    | CTTCACGCTCTTGAGACTTTGGTTC  |
| <i>Mmp9</i>  | GCCCTGGAACCTCACACGACA    | TTGGAAACTCACACGCCAGAAG     |
| <i>Gapdh</i> | TGTGTCCGTCGTGGATCTGA     | TTGCTGTTGAAGTCGCAGGAG      |

Primer sequences.

# Supplemental Figure 1

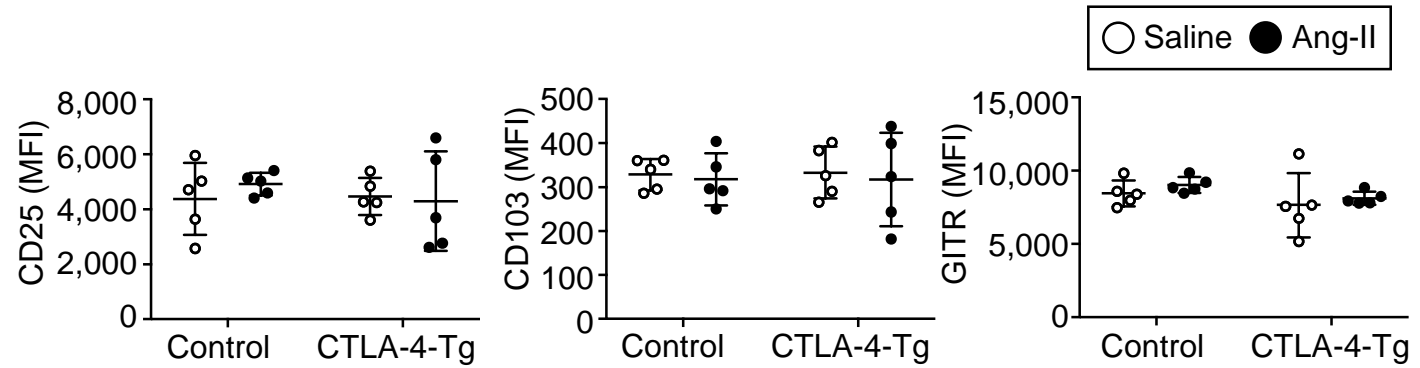

**Supplemental Figure 1.** The effect of cytotoxic T lymphocyte-associated antigen-4 (CTLA-4) overexpression on Treg-associated markers. Seven days after the pump implantation, apolipoprotein E-deficient (*ApoE*<sup>-/-</sup>) and CTLA-4-Tg/*ApoE*<sup>-/-</sup> mice with or without angiotensin II infusion were euthanized and lymphoid cells from spleen were prepared. *ApoE*<sup>-/-</sup> mice infused with angiotensin II or saline served as controls. The expression levels of Treg-associated markers were analyzed gating on splenic CD4<sup>+</sup>Foxp3<sup>+</sup> Tregs. Histograms show mean fluorescence intensity (MFI). n=5 per group. Data points represent individual animals. Horizontal bars represent means. Error bars indicate s.d. Ang-II, angiotensin II; GITR, glucocorticoid-induced tumor necrosis factor receptor family-related gene/protein.

## Supplemental Figure 2

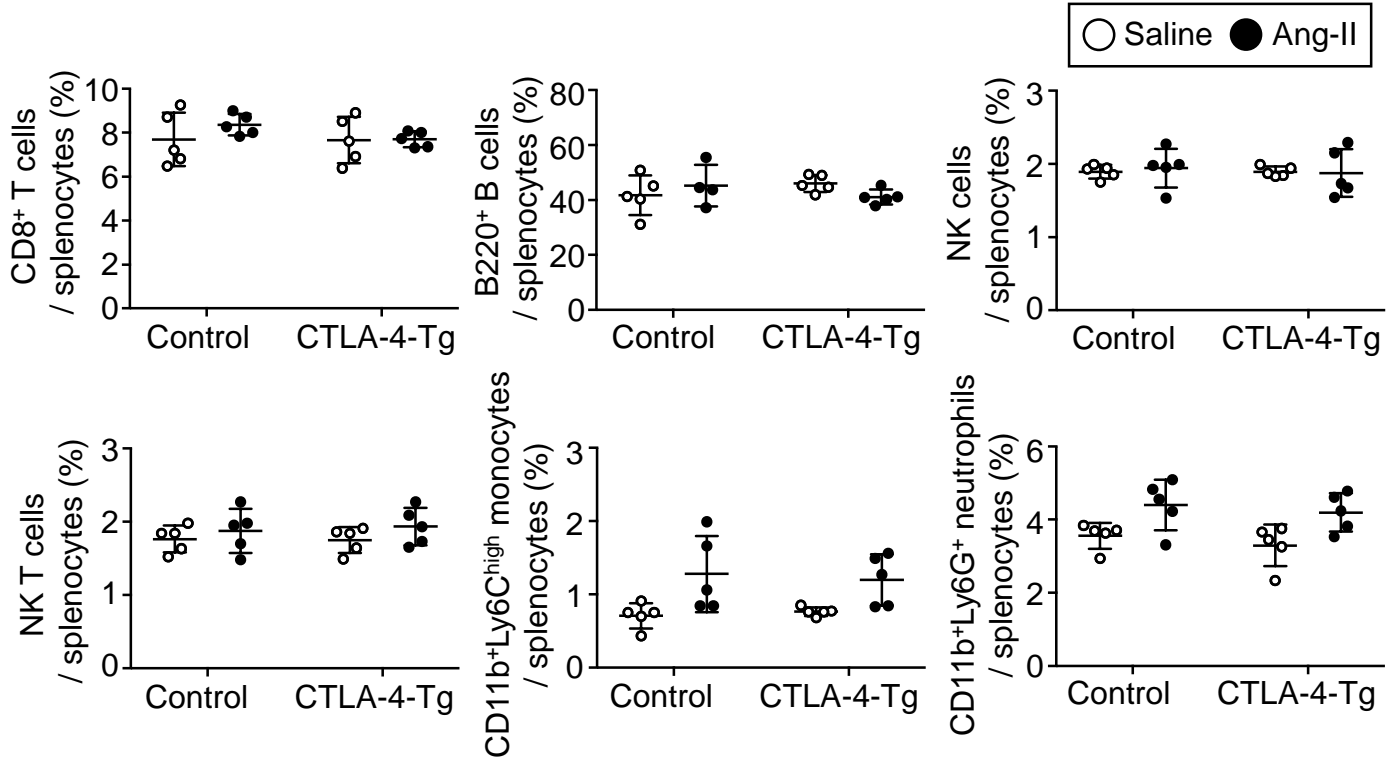

**Supplemental Figure 2.** Overexpression of cytotoxic T lymphocyte-associated antigen-4 (CTLA-4) does not affect immune cells other than CD4<sup>+</sup> T cells in spleen. Seven days after the pump implantation, apolipoprotein E-deficient (*ApoE*<sup>-/-</sup>) and CTLA-4-Tg/*ApoE*<sup>-/-</sup> mice with angiotensin II or saline infusion were euthanized and lymphoid cells from spleen were prepared. *ApoE*<sup>-/-</sup> mice infused with angiotensin II or saline served as controls. Percentages of splenic CD8<sup>+</sup> T cells, B220<sup>+</sup> B cells, natural killer (NK) cells, NK T cells, CD11b<sup>+</sup>Ly6C<sup>high</sup> monocytes, CD11b<sup>+</sup>Ly6G<sup>+</sup> neutrophils were determined by flow cytometry. n=4 to 5 per group. Data points represent individual animals. Horizontal bars represent means. Error bars indicate s.d. Ang-II, angiotensin II.

## Supplemental Figure 3

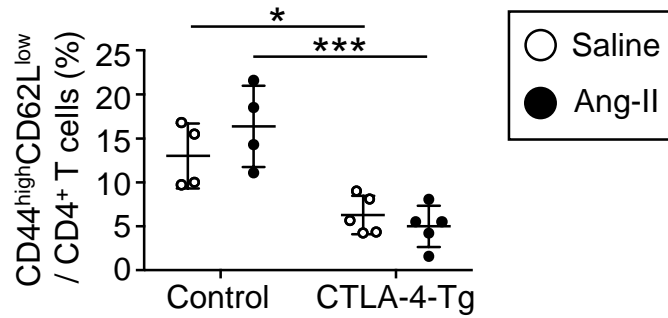

**Supplemental Figure 3.** Overexpression of cytotoxic T lymphocyte-associated antigen-4 (CTLA-4) suppresses Teff responses in the para-aortic lymph nodes (LNs) of angiotensin II-infused or saline-infused mice. Seven days after the pump implantation, lymphoid cells from para-aortic LNs were prepared. Apolipoprotein E-deficient (*ApoE*<sup>-/-</sup>) mice infused with angiotensin II or saline served as controls. The graph represents the percentage of CD44<sup>high</sup>CD62L<sup>low</sup> effector T cells within the CD4<sup>+</sup> population assessed by flow cytometry. n=4 to 5 per group. Data points represent individual animals. Horizontal bars represent means. Error bars indicate s.d. \**P*<0.05; \*\*\**P*<0.001; one-way ANOVA followed by Tukey's post hoc test. Ang-II, angiotensin II.
